# Supplementary material for: Association between Objectively Measured Sedentary Behaviour and Sleep Quality in Japanese Adults: A Population-Based Cross-Sectional Study
Source: MDPI journal article supplement (doi:10.3390/ijerph19053145), 2022-03-07
Supplement: s1 [file s1]

**Table S1.** Association between the seven component scores of PSQI and sedentary time.

|                     | <b>B</b> | <b><math>\beta</math></b> | <b>95% CI</b> | <b><i>p</i>-Value</b> |
|---------------------|----------|---------------------------|---------------|-----------------------|
| daytime dysfunction | 0.31     | 0.14                      | (0.15, 0.47)  | <0.001                |
| sleep latency       | 0.20     | 0.10                      | (0.06, 0.34)  | 0.005                 |

Stepwise linear regression models were used.  $\beta$  = standardized regression coefficient. CI: Confidence interval.

**Table S2.** Association between PSQI  $\geq 6$  and VFA and BMI, respectively

|         | <b>VFA</b>        | <b><i>p</i>-Value</b> | <b>BMI</b>        | <b><i>p</i>-Value</b> |
|---------|-------------------|-----------------------|-------------------|-----------------------|
| Model 1 | 1.26 (1.01, 1.57) | 0.043                 | 1.15 (0.95, 1.40) | 0.143                 |
| Model 2 | 1.31 (1.03, 1.70) | 0.026                 | 1.21 (0.98, 1.50) | 0.070                 |

VFA, visceral fat area; BMI, body mass index. Values shown are odds ratios (95% confidence intervals) for per 1SD change in VFA or BMI. Logistic regression models were used in the present study. Model 1 was adjusted for age and sex. Model 2 was adjusted for Model 1 plus smoking status, alcohol intake, CES-D score, and MVPA.
